# Supplementary material for: Effects of dust aerosols on tropospheric chemistry during a typical pre-monsoon season dust storm in northern India
Source: Copernicus journal article supplement (doi:10.5194/acp-14-6813-2014), 2014-07-04
Supplement: Supplementary file 1 [file acp-14-6813-2014-supplement.pdf]

Supplement of Atmos. Chem. Phys., 14, 6813–6834, 2014  
<http://www.atmos-chem-phys.net/14/6813/2014/>  
doi:10.5194/acp-14-6813-2014-supplement  
© Author(s) 2014. CC Attribution 3.0 License.

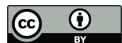

*Supplement of*

## **Effects of dust aerosols on tropospheric chemistry during a typical pre-monsoon season dust storm in northern India**

**R. Kumar et al.**

*Correspondence to:* R. Kumar (rkumar@ucar.edu)

## 1 **S1 Update of the F-TUV photolysis scheme**

2 Here, we first examine the differences in aerosol optical properties due to use of different  
3 calculation methods in the optical driver and the F-TUV photolysis scheme. The impact of these  
4 differences on the distributions of photolysis rates and surface ozone and NO<sub>2</sub> are described  
5 thereafter. The spatial distributions of aerosol optical depth (AOD), single scattering albedo  
6 (SSA) and asymmetry parameter (*g*) calculated by the F-TUV scheme and the optical driver at  
7 300 nm are shown in Figure S1 for 21 April 2010 at 08 GMT to highlight the difference between  
8 the two schemes. Since the effect of dust aerosols is not included in the F-TUV scheme, we  
9 excluded their effect also from the optical driver for comparison in Figure S1. Both methods (F-  
10 TUV scheme and optical driver) yield similar spatial distributions of AOD over the model  
11 domain with highest values over the Indo-Gangetic Plain region, Himalayan foothills and  
12 northern Bay of Bengal, but differences in AOD between the two schemes range from -30% to  
13 10%. Both methods also produce similar spatial distributions of SSA, but there are large  
14 differences of 30-50% between the two methods. The asymmetry parameter *g* does not vary  
15 much spatially and both methods estimate *g* to within 10%. The analysis of spectral variations of  
16 SSA and *g* values used by the two methods for different aerosol components (black carbon,  
17 organic carbon, sulphate and sea-salt) suggest that the aforementioned differences in aerosol  
18 optical properties arise mainly due to differences in the optical properties of black carbon  
19 aerosols used by the two methods. The SSA values for BC aerosol used by the F-TUV scheme  
20 and optical driver in 300-736 nm wavelength range (representing the range of photolysis  
21 occurrence in the troposphere) are in the range of 0.08-0.14 and 0.03-0.21 respectively while the  
22 *g* values are in the range of 0.04-0.20 and 0.02-0.11 respectively. Both methods use the SSA  
23 values of 0.98-1.0 for organic carbon, sulphate and sea-salt aerosols, however there are

1 differences in the  $g$  values of these aerosols between the two methods particularly in the  
2 wavelength range of 447-736 nm.

3  
4 To understand the importance of these differences in the context of gas-phase chemistry, we  
5 coupled the aerosol optical properties calculated by the optical driver into the F-TUV photolysis  
6 scheme. This coupling required the mapping of optical driver output at 4 wavelengths (300, 400,  
7 600 and 999 nm) to 17 wavelengths (178-736 nm) of the F-TUV scheme. The AOD value at  
8 each F-TUV wavelength is calculated following the Angström power law:

$$F(\lambda) = O(400) \times \left(\frac{\lambda}{400}\right)^{-\alpha} \quad (\text{S1})$$

9 where  $F(\lambda)$  is the F-TUV AOD at wavelength  $\lambda$  (178-736 nm),  $O(400)$  is the AOD calculated by  
10 the optical driver at 400 nm, and  $\alpha$  is the Angström exponent calculated from optical driver's  
11 AOD at 300 and 999 nm using the following relation:

$$\alpha = \frac{\ln\left(\frac{O(300)}{O(999)}\right)}{\ln\left(\frac{999}{300}\right)} \quad (\text{S2})$$

12 The SSA and  $g$  values at each F-TUV wavelength are determined by linearly interpolating/  
13 extrapolating the SSA and  $g$  values from the optical driver. This is the same method as is used by  
14 the WRF-Chem model to map the optical driver output to Rapid Radiative Transfer Model  
15 (RRTM) spectra for calculating the effect of aerosols on meteorology.

16  
17 The spatial distributions of the  $\text{NO}_2$  photolysis rate,  $\text{NO}_2$  and  $\text{O}_3$  mixing ratios calculated using  
18 aerosol optical properties from the F-TUV scheme and the optical driver on 21 April 2010 at 08  
19 UTC are shown in Figure S2. The  $\text{NO}_2$  photolysis rates using both methods show similar spatial  
20 distributions with higher values over the oceanic regions and lower values over the inland

1 regions. The lowest photolysis rates and highest differences (10-30%) are seen along the Indo-  
2 Gangetic Plain region which is where the aerosol loading is highest (Figure S1). Both NO<sub>2</sub> and  
3 ozone mixing ratios also show similar spatial distributions with highest values as well as  
4 differences along the Indo-Gangetic Plain region. The differences are of the order of 3-10% for  
5 NO<sub>2</sub> and 1-5% for ozone. These differences point out the inconsistency in the effects of aerosols  
6 on gas phase chemistry in the WRF-Chem model. To avoid this inconsistency, we use the  
7 aerosol optical properties from the optical driver to modify the photolysis rates as well as the  
8 meteorology, because the SSA value simulated by the optical driver (0.8-0.9) are closer to the  
9 measured value (0.75-0.9) reported for the Indian region (Ganguly et al., 2005) as compared to  
10 the SSA simulated by the F-TUV scheme (0.5-0.6).

11

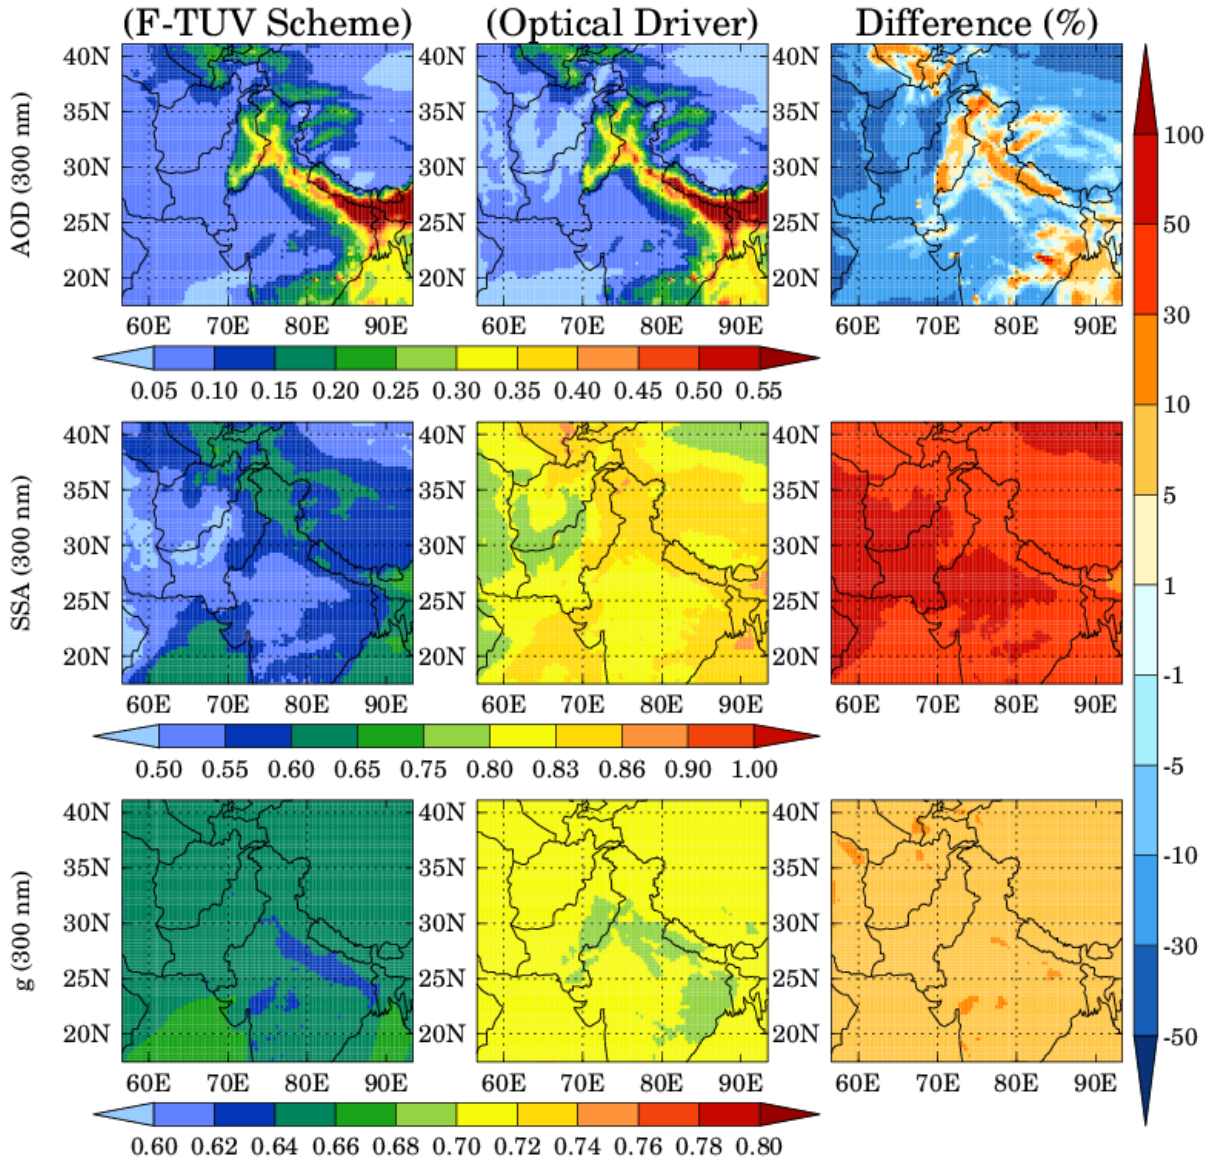

1  
 2 **Figure S1:** Spatial distributions of aerosol optical depth (AOD), single scattering albedo  
 3 (SSA) and asymmetry parameter (g) calculated by the F-TUV scheme and optical driver at  
 4 300 nm on 21 April 2010 at 08 GMT. The percentage differences in aerosol optical  
 5 properties between F-TUV and optical driver are also shown.

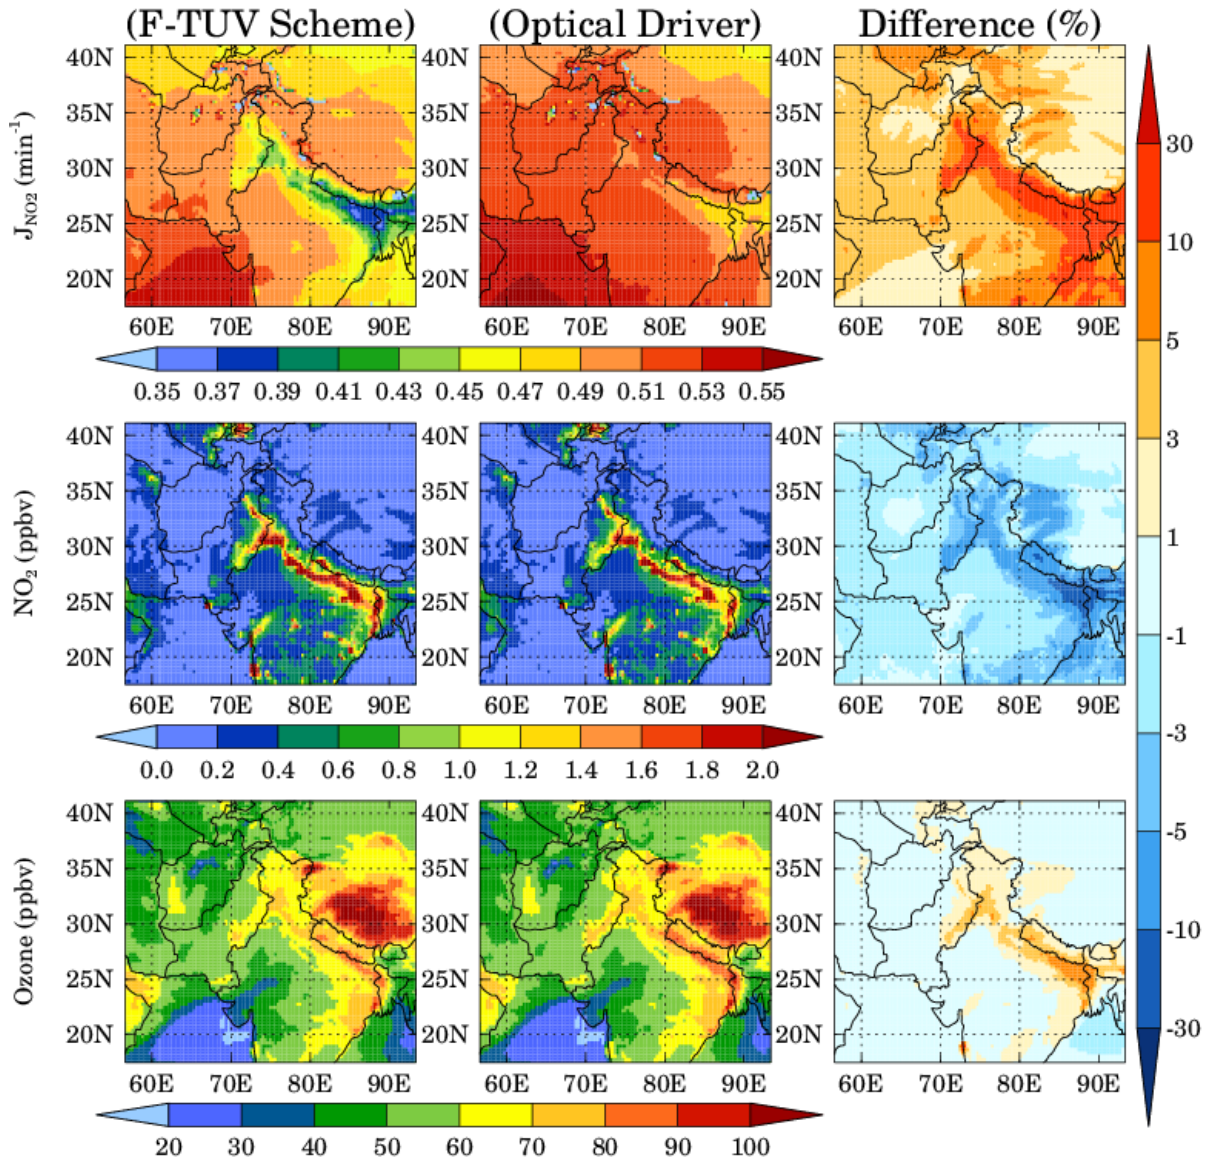

1  
2  
3  
4  
5  
6  
7  
8

**Figure S2:** Spatial distributions of  $NO_2$  photolysis rate ( $J_{NO_2}$ ),  $NO_2$  (ppbv) and ozone (ppbv) simulated by WRF-Chem using aerosol optical properties calculated by the F-TUV scheme and the optical driver on 21 April 2010 at 08 GMT. The percentage differences in all the parameters are also shown.
